# Supplementary material for: Correction of the aprt Gene Using Repair-Polypurine Reverse Hoogsteen Hairpins in Mammalian Cells
Source: PubMed Central journal article supplement — Mol Ther Nucleic Acids. 2019 Dec 24;19:683–95. doi: 10.1016/j.omtn.2019.12.015 (PMC6965513; doi:10.1016/j.omtn.2019.12.015), 2019-12-24
Supplement: mmc1.pdf [file mmc1.pdf]

OMTN, Volume 19

## Supplemental Information

### Correction of the *aprt* Gene Using Repair-Polypurine Reverse Hoogsteen Hairpins in Mammalian Cells

Alex J. Félix, Carlos J. Ciudad, and Véronique Noé

Table S1. *aprt*-deficient CHO mutant cell lines subjected to correction with repair-PPRHs.

| Cell line | Position          | Mutation (5'-3')            | Codon change                   | Reference                 |
|-----------|-------------------|-----------------------------|--------------------------------|---------------------------|
| S23       | +93<br>(exon 1)   | <u>G</u> A A > <u>T</u> A A | Glutamic acid > Ochre in place | Phear et al. <sup>1</sup> |
| S62       | +1968<br>(exon 5) | <u>G</u> G A > <u>T</u> G A | Glycine > Opal in place        |                           |
| S1        | +397<br>(exon 2)  | T A <u>C</u> > T A <u>G</u> | Tyrosine > Amber in place      |                           |

Position numbers refer to the transcription start site. Point mutations are underlined in their position within the codon.

Table S2. Oligodeoxynucleotides used in this work.

| Name          | Length (nt) | Sequence (5'→3')                                                                                                      |
|---------------|-------------|-----------------------------------------------------------------------------------------------------------------------|
| HpS23E1rep    | 100         | CGCGGCTATGGCG <u>G</u> AATCTGAGTTGCAGCTGGTGGCGCAGCGCATCCGCAGAAAGGGGCTGAA<br>GGGGTAGGGGTTTTTGGGGATGGGGAAGTCGGGGAAA     |
| HpS62E5rep    | 100         | TGTGTGAGCCTGGTGGAGCTGACCTCACTTAAGGGCAGAGAGAAGCTA <u>G</u> GATCAGTAGGTAAG<br>AAGAGAGAGGACGTTTTTGCAGGAGAGAGAAGAATGG     |
| HpS1E2rep     | 100         | CGACTA <u>C</u> ATCGCAGGCGAGTGGCCATGCCAGGCCGTGCTGGTCCCCACTGTGCAGGGAGGGG<br>AGGGAAGGGAATATTTTTATAAGGGAAGGGAGGGGAG      |
| LD-HpS1E2rep  | 100         | CCACGCATGGCGGCAAGATCGACTA <u>C</u> ATCGCAGGCGAGTGGCCATGCCAGGcttttGAGGGGAGG<br>GAAGGGAATATTTTTATAAGGGAAGGGAGGGGAG      |
| RD-S23E1rep   | 51          | CGCGGCTATGGCG <u>G</u> AATCTGAGTTGCAGCTGGTGGCGCAGCGCATCCGCAG                                                          |
| RD-S62E5rep   | 57          | TGTGTGAGCCTGGTGGAGCTGACCTCACTTAAGGGCAGAGAGAAGCTA <u>G</u> GATCAGTA                                                    |
| RD-S1E2rep    | 57          | CGACTA <u>C</u> ATCGCAGGCGAGTGGCCATGCCAGGCCGTGCTGGTCCCCACTGTGCAGG                                                     |
| HpS23E1-core  | 49          | AAAGGGGCTGAAGGGTAGGGTTTTTGGGGATGGGGAAGTCGGGGAAA                                                                       |
| O-16          | 16          | CCCCGACTTCCCATC                                                                                                       |
| O-40          | 40          | GCAGCGCATCCGAGTTTCCCAGACTTCCCATCCCCGGC                                                                                |
| O-60          | 60          | TCTGAGTTGCAGCTGGTGGCGCAGCGCATCCGCAGTTTCCCAGACTTCCCATCCCCGGC                                                           |
| Hp-core-Sc    | 53          | AAGGAAGGAAGGAAGGAAGGAAGGTTTTTGGAAAGGAAGGAAGGAAGGAAGGA                                                                 |
| RD-Sc         | 46          | TAGTTAATAATTGTAGTACTTACTCTGGGAGAAGTTTATATTCTC                                                                         |
| Hp-rep-Sc     | 95          | CTGCGGATGCGCTGCGCCACCAGCTGCAACTCAGATTCCGCCATAGCCCGTGCACGAGAAAGG<br>GCGGAGGGATTTTTAGGGAGGCGGGAAAGAG                    |
| HpS23E1rep-Sc | 104         | CGCGGCTATGGCG <u>G</u> AATCTGAGTTGCAGCTGGTGGCGCAGCGCATCCGCAGAAGGAAGGAAGG<br>AAGGAAGGAAGGTTTTTGGAAAGGAAGGAAGGAAGGAAGGA |

The name, length and sequence of each oligonucleotide are indicated. The corrected nucleotide is underlined. Abbreviations are: Hp, hairpin; LD, long-distance repair-PPRH; RD, repair domain; Sc, scramble sequence. In the case of the long-distance repair-PPRH sequence (LD-HpS1E2rep), the additional five-thymidine loop between the repair domain and the hairpin core is represented in lower case.

## References

1. Phear, G, Armstrong, W and Meuth, M (1989). Molecular basis of spontaneous mutation at the *aprt* locus of hamster cells. *J. Mol. Biol.* **209**: 577–582.
